# Supplementary material for: Covalently grafting a covalent organic framework onto carbon nanotubes as a bifunctional electrocatalyst for overall water splitting
Source: Royal Society of Chemistry journal article supplement (doi:10.1039/d4cc03117b), 2024-01-01
Supplement: d4cc03117b1.pdf [file d4cc03117b1.pdf]

## Supporting Information for

### Covalently grafting covalent organic framework onto carbon nanotubes as bifunctional electrocatalyst for overall water splitting

Hongwei Li,<sup>a</sup> Qizhe He<sup>a</sup>, Yunye Cao,<sup>\*a</sup> Lei Lei,<sup>b</sup> Degao Wang,<sup>\*bc</sup> Ting-Ting Li<sup>\*a</sup>

<sup>a</sup>School of Materials Science and Chemical Engineering, Ningbo University, Ningbo, Zhejiang, 315211, China. E-mail: litingting@nbu.edu.cn; caoyunye@nbu.edu.cn.

<sup>b</sup>Engineering Laboratory of Advanced Energy Materials, Ningbo Institute of Materials Technology and Engineering, Chinese Academy of Sciences, Ningbo, Zhejiang, 315201, China. wangdegao@nimte.ac.cn.

<sup>c</sup>Research Center for Advanced Interdisciplinary Sciences, Ningbo Institute of Materials Technology and Engineering, Chinese Academy of Sciences, Ningbo, Zhejiang, 315201, China.

#### Materials and Methods

##### Materials

All chemicals were purchased from commercial sources and used without further treatment. Potassium hydroxide, dioxane, mesitylene, Ni(OAc)<sub>2</sub>·4H<sub>2</sub>O, acetic acid (HOAc), tetrahydrofuran (THF), and isopropyl alcohol were purchased from Aladdin Biochemical Technology Co., Ltd. Nafion solution (5 wt %) was purchased from Alfa Aesar Co., Ltd. Carbon nanotubes (CNTs) were purchased from Jiangsu XFNANO Materials Tech Co., Ltd. Amino-functionalized carbon nanotubes (NCNTs), methanol (99.9%) were purchased from PETSUN Co., Ltd. 2,2'-bipyridine-5,5'-diamine (Bpy) and 1,3,5-triformylphloroglucinol (Tp) were purchased from Leyan Co., Ltd.

##### Synthesis of TpBpy, NiTpBpy, NiTpBpy@CNTs, NiTpBpy@NCNTs

The synthesis of TpBpy in this study follows a previously reported method but with a slight modification.<sup>1</sup> Initially, in a 10 mL Pyrex tube, Tp (21.0 mg, 0.1 mmol), Bpy (27.9 mg, 0.15 mmol), mesitylene (1.5 mL), dioxane (1.5 mL), and 6 M HOAc (0.3 mL) were added. The mixture was then sonicated for 30 minutes and degassed through three freeze-pump-thaw cycles before being sealed under vacuum. The sealed tube was subsequently placed in an oven at 120 °C for 3 days and then cooled to room temperature. The resulting precipitate was collected by filtration, and washed with THF and acetone multiple times. The product was then Soxhlet extracted with THF and acetone for 2 days and dried under vacuum at 60 °C for 24 hours, affording TpBpy (39.1 mg, yield: 80.1 %). To incorporate

Ni(II) ions into the COF, 50 mg of the synthesized TpBpy was treated with Ni(OAc)<sub>2</sub>·4H<sub>2</sub>O (20 mg) dissolved in 20 mL of dry methanol. The resulting solution was stirred for 6 hours at room temperature and then washed with a copious amount of dry methanol. The obtained NiTpBpy was activated using a vacuum overnight at 60 °C.

NiTpBpy@CNTs and NiTpBpy@NCNTs were synthesized using the same process with the addition of CNTs (122.2 mg) or NCNTs (122.2 mg) as the scaffold at the synthesis step.

### Physical Characterizations

Powder X-ray diffraction (PXRD) patterns of the samples were recorded using an X-ray diffractometer (Bruker D8 Advance) with a Cu K $\alpha$  radiation source at 1600 W (40 kV voltage, 40 mA) power. Fourier transform infrared (FT-IR) spectroscopy was performed using an FT-IR spectrometer (Thermo Scientific Nicolet iS20) in a wavenumber range of 4000 ~ 400 cm<sup>-1</sup>. The metal content of the sample was determined by inductively coupled plasma optical emission spectroscopy (ICP-OES, Thermo Fisher iCAPPRO). Scanning electron microscopy (SEM) was carried out using a FEI Nova NanoSEM 450 scanning electron microscope with an accelerating voltage of 5 kV. Transmission electron microscopy (TEM) and high-resolution TEM (HR-TEM) were performed using a FEI Tecnai G2 F20 electron microscope equipped with an elemental mapping and energy dispersive spectroscopy (EDS) detector and operated at an accelerating voltage of 200 kV. The surface chemical composition of the samples was determined by in-situ electrochemical confocal Raman micro-spectroscopy using a Raman spectrometer (UniDRON) equipped with a 532 nm laser source and an Olympus  $\times$  50 Lwd objective. The scanning range was from 200 to 800 cm<sup>-1</sup>. The resolution of the Raman spectrum was 4 cm<sup>-1</sup>. The electrochemical cell, designed and constructed in-house, was based on a round Teflon-lined dish. To meet the experimental requirements, the electrochemical cell was filled with a 1 M KOH solution. Different voltages were applied from 1.0 to 2.2 V vs RHE, and each voltage was tested for 1200 s. The Brunauer-Emmett-Teller (BET) specific surface area was measured on an apparatus (ASAP 2020) via adsorption-desorption isotherm at 77 K. X-ray photoelectron spectroscopy (XPS) measurement was recorded on a Thermo Scientific K-Alpha XPS system using C 1s (284.8 eV) as the reference binding energy. X-ray absorption fine structure spectra (Ni K-edge) were recorded at a laboratory device (easyXAFS300+, easyXAFS LLC), which is based on Rowland circle geometries with spherically bent crystal analyzers (SBCA) and operated by a Mo X-ray tube source and a silicon drift detector (AXAS-M2, KETEK GmbH) using a silicon double-crystal monochromator.<sup>2</sup> Before X-ray absorption fine structure (XAFS) measurement, the sample was uniformly grounded and then pressed into a wafer with a thickness of ~1 mm by a tablet press. The wafer was fixed with the special adhesive tape on the 8-position automatic sample wheel. The data collection was

finished in transmission mode for the samples of Ni foil, NiPc, NiO, and NiTpBpy. All pristine spectra data were collected in ambient conditions. The obtained XAFS data was processed in Athena software (version 0.9.26) for background, pre-edge line, and post-edge line calibrations. Then Fourier transformed fitting was carried out in Artemis software (version 0.9.26). For EXAFS modeling, EXAFS of the Ni foil is fitted, and the obtained amplitude reduction factor  $S_0^2 = 0.75$  was set in the EXAFS analysis to determine the coordination numbers in NiTpBpy. For Wavelet Transform analysis, the  $\chi(k)$  exported from Athena was imported into the Matlab. The parameters were listed as follows: R range, 0 ~ 6 Å, k range, 0 ~ 12 Å<sup>-1</sup> for Ni foil, NiO, NiPc, and NiTpBpy; k weight, 3; Morlet function with  $\kappa = 5$ ,  $\sigma = 1$  was used as the mother wavelet to provide the overall distribution.

### **Electrode preparation**

The 1 cm × 1.5 cm pieces of carbon cloth were first subjected to a 30-minute sonication process in ethanol and acetone solutions to eliminate surface carbon deposits and oil contamination. To enhance the hydrophilicity of carbon cloth, a sequential process is carried out. Initially, the carbon cloth was immersed in a round-bottomed flask containing concentrated sulfuric acid and concentrated nitric acid, with a volume ratio of 3:1, followed by heating at 70 °C for 8 hours. Subsequently, it was rinsed several times with deionized water to eliminate any remaining acids. To ensure the complete elimination of sulfuric acid and nitric acid residues, the carbon cloth was sonicated in deionized water until the pH of the solution reached approximately 7. Afterward, the carbon cloth was dried overnight at 100 °C in an oven. To prepare the catalyst ink, the catalyst was dispersed in a mixed solution of isopropanol, water, and 5 wt % Nafion was added to formulate a catalyst ink of 1.0 mg mL<sup>-1</sup>. Then, 200 μL of the ink was deposited uniformly onto the carbon cloth (1 × 1 cm<sup>2</sup>) to achieve a working electrode with a catalyst loading amount of 0.2 mg cm<sup>-2</sup>. Finally, the electrode was dried overnight at room temperature.

### **Preparation of Pt/C and RuO<sub>2</sub> electrodes**

Typically, 2.5 mg of commercial RuO<sub>2</sub> or Pt/C (20 wt%) was dispersed in a mixture solution with DI water (400 μL), absolute ethanol (560 μL), and Nafion solution (5 wt%, 40 μL), and then ultra-sonicated to form a homogeneous catalyst ink. RuO<sub>2</sub> or Pt/C electrode was obtained by uniformly dropping 80 μL of the catalyst ink onto the treated carbon cloth (1 × 1 cm<sup>2</sup>) and finally drying overnight at room temperature.

### **Electrochemical measurements**

The electrochemical measurements were carried out on an electrochemical workstation (CHI 760E) with a three-electrode system at room temperature. In the standard three-electrode system, Ag/AgCl and graphite rod or Platinum mesh served as the reference electrode and the counter electrode, respectively. The overall water splitting experiment

was performed by a two-electrode system of carbon cloth ( $1 \times 1 \text{ cm}^{-2}$ ) with catalyst loading of  $0.2 \text{ mg cm}^{-2}$  after a similar process. Electrochemical measurements were performed in  $1 \text{ M KOH}$  solution, while  $\text{N}_2$  and  $\text{O}_2$  were introduced into the  $\text{KOH}$  solution to saturation before the HER and OER testing, respectively. The reversible hydrogen electrode (RHE) was calibrated to all of the potentials referenced in this study, based on the equation:  $E_{(\text{RHE})} = E_{\text{Ag}/\text{AgCl}} + 0.197 + 0.059 \times \text{pH}$ . The polarization curves of the HER or OER were examined by linear sweep voltammetry (LSV) measurement at a scan rate of  $5 \text{ mV s}^{-1}$  with 95%  $iR$  compensation for the OER and 80%  $iR$  compensation for the HER, and the value of the Tafel slope was calculated from the corresponding LSV plots. Cyclic voltammetry (CV) curves for the OER were recorded at different scan rates (20, 40, 60, 80, and  $100 \text{ mV s}^{-1}$ ) in the potential range of  $1.1 \sim 1.2 \text{ V}$  vs RHE, and each  $\Delta j/2$  was calculated at  $1.15 \text{ V}$  vs RHE to evaluate the double-layer capacitance ( $C_{\text{dl}}$ ) values. CV curves for the HER were recorded at different scan rates (20, 40, 60, 80, and  $100 \text{ mV s}^{-1}$ ) in the potential range of  $0.1 \sim 0.2 \text{ V}$  vs RHE, and each  $\Delta j/2$  was calculated at  $0.15 \text{ V}$  vs RHE to evaluate the  $C_{\text{dl}}$  values. The chronoamperometry tests for HER and OER stability evaluation were conducted at  $-0.41 \text{ V}$  vs RHE and  $1.59 \text{ V}$  vs RHE, respectively. Electrochemical impedance spectroscopy (EIS) analysis was examined at a certain overpotential of  $150 \text{ mV}$  for the HER in the frequency range from  $10^{-2}$  to  $10^5 \text{ Hz}$  with a sinusoidal amplitude of  $5 \text{ mV}$ .

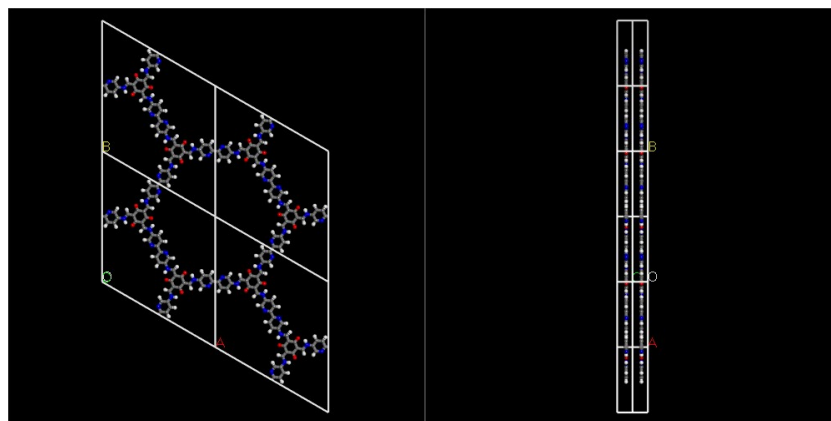

**Fig. S1.** Top and side views of the AA stacking structure of TpBpy (gray, C; blue, N; red, O; white, H).

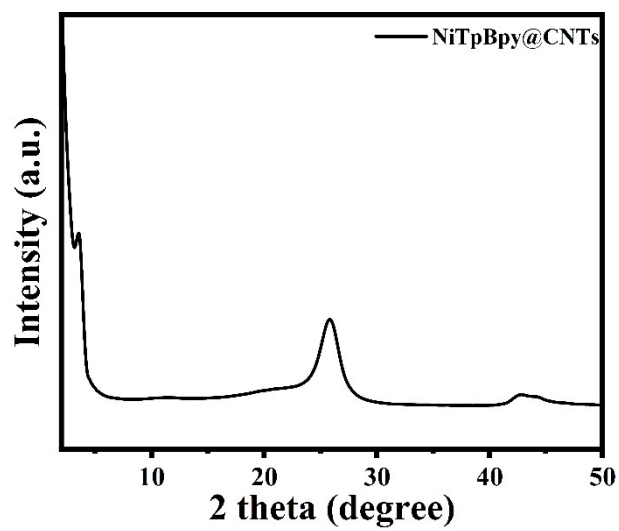

Fig. S2. PXRD patterns of NiTpBpy@CNTs.

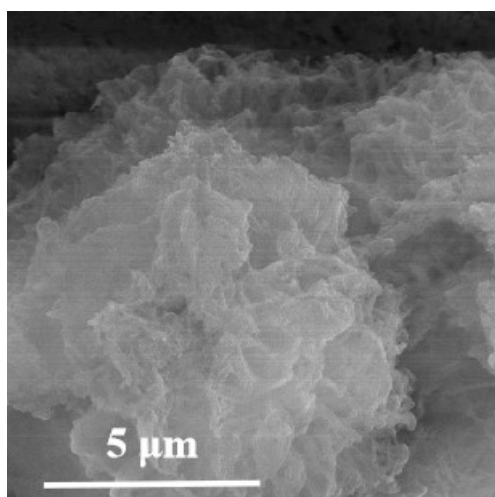

Fig. S3. SEM image of TpBpy.

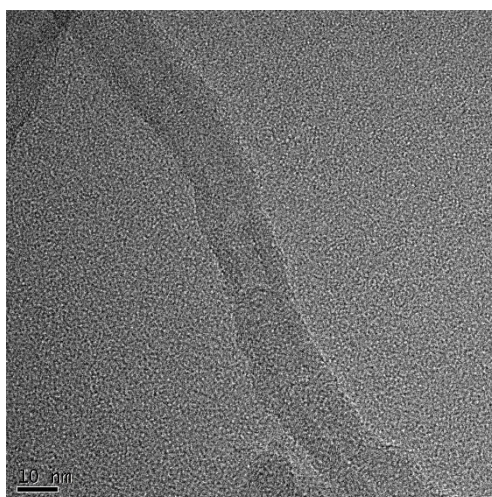

Fig. S4. TEM image of NCNTs.

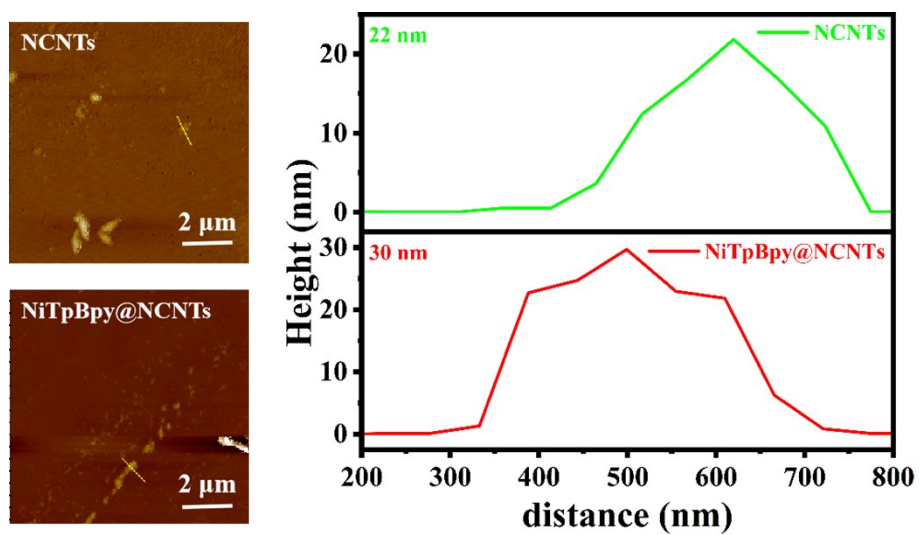

Fig. S5. AFM images of NCNTs and NiTpBpy@NCNTs.

NCNTs

$\theta = 123^\circ$  NiTpBpy@NCNTs

$\theta = 0^\circ$

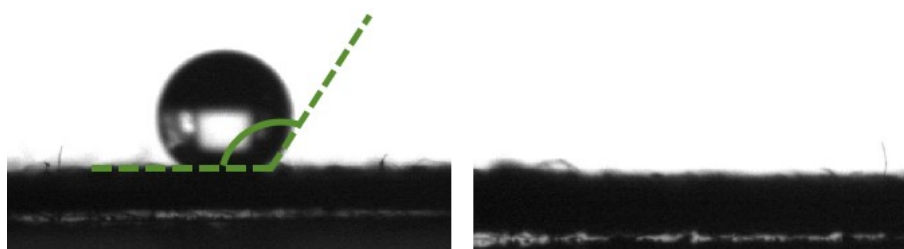

Fig. S6. The contact angles of NCNTs and NiTpBpy@NCNTs at the solid-liquid interface.

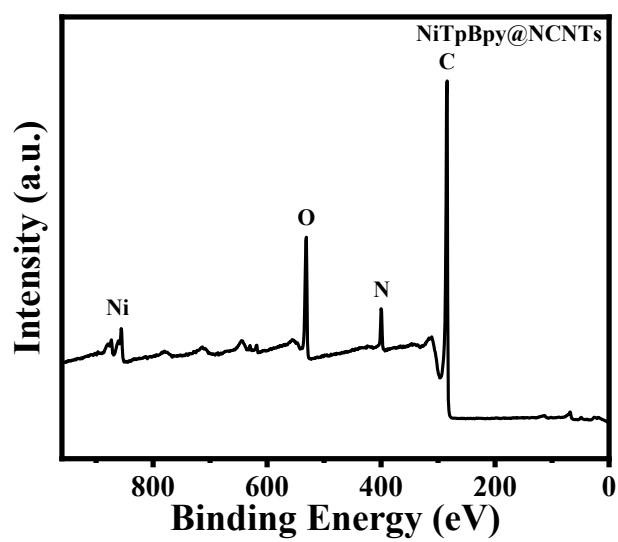

Fig. S7. The XPS survey spectrum of NiTpBpy@NCNTs.

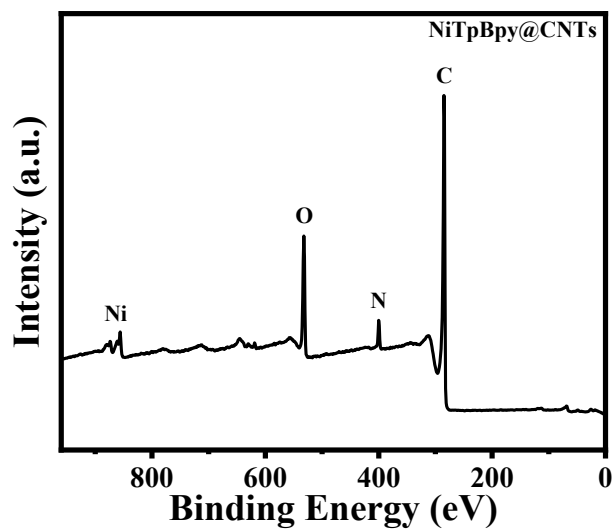

Fig. S8. The XPS survey spectrum of NiTpBpy@CNTs.

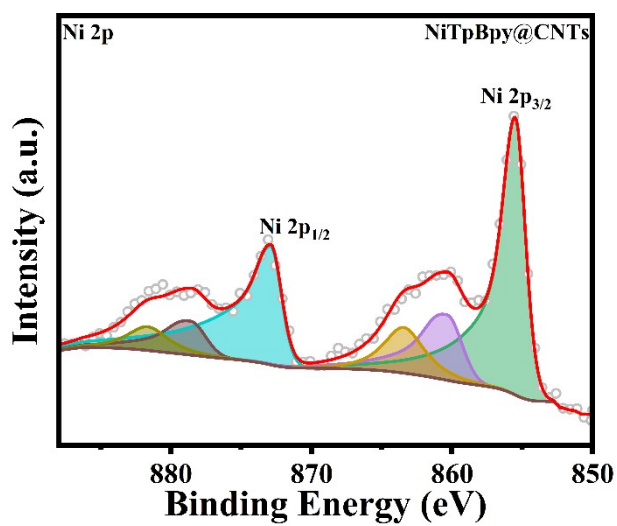

Fig. S9. High-resolution Ni 2p XPS spectrum of NiTpBpy@CNTs.



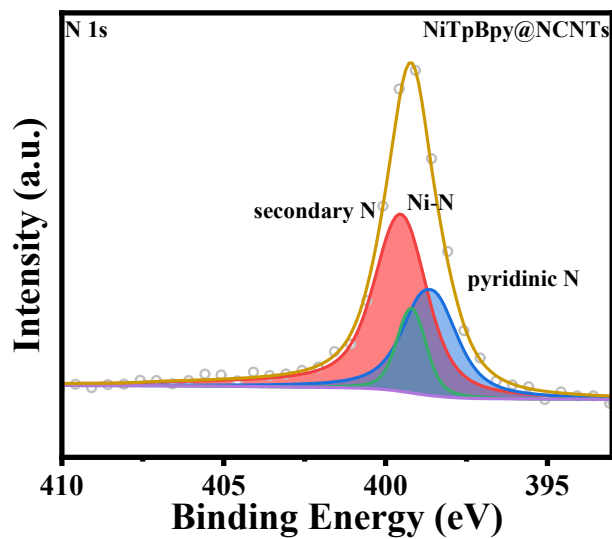

Fig. S10. High-resolution N 1s XPS spectrum of NiTpBpy@NCNTs.

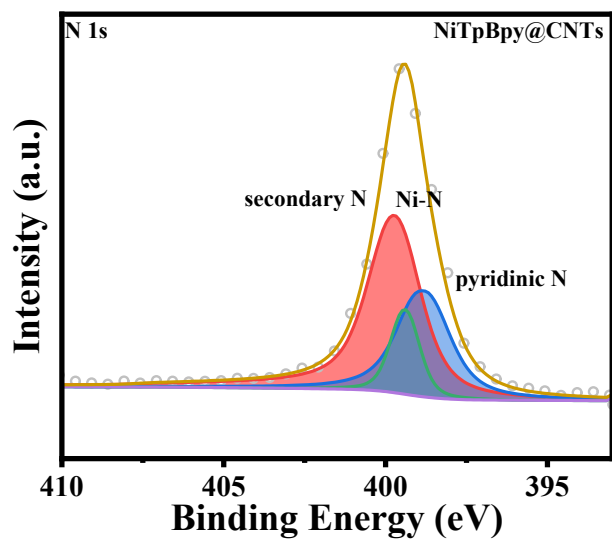

Fig. S11. High-resolution N 1s XPS spectrum of NiTpBpy@CNTs.

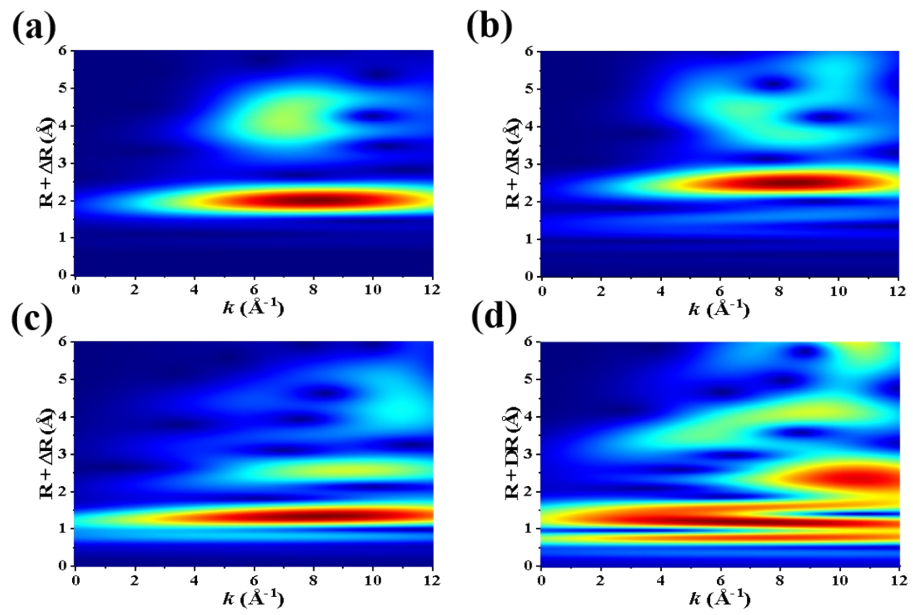

Fig. S12. The WT-EXAFS analysis of (a) Ni foil, (b) NiO, (c) NiPc, and (d) NiTpBpy.

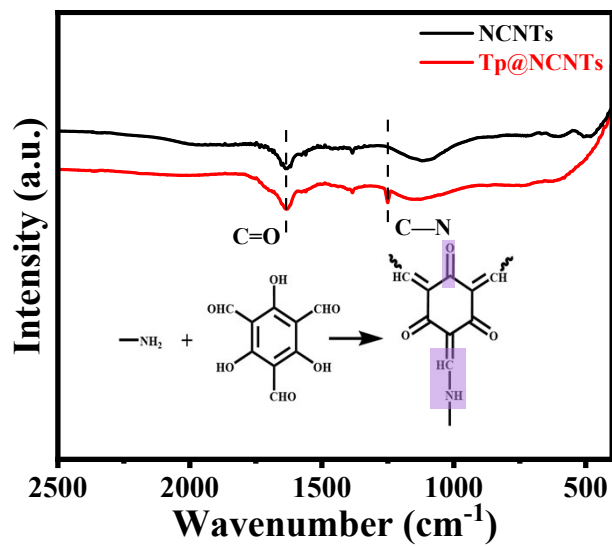

Fig. S13. FT-IR spectra of NCNTs and Tp@NCNTs.

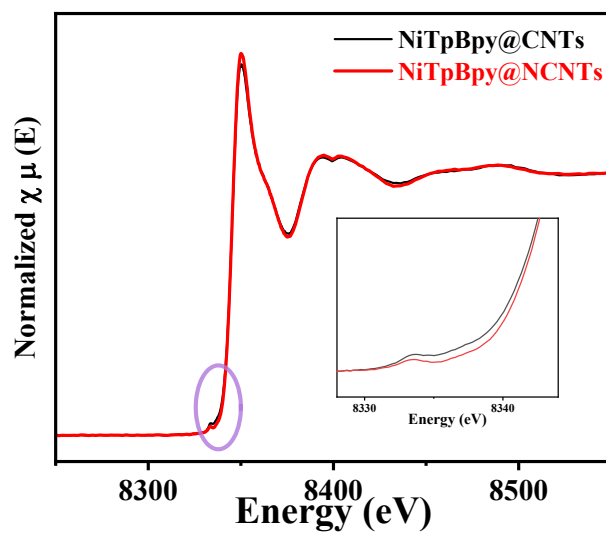

Fig. S14. Normalized Ni K-edge XANES spectra for NiTpBpy@CNTs and NiTpBpy@NCNTs.

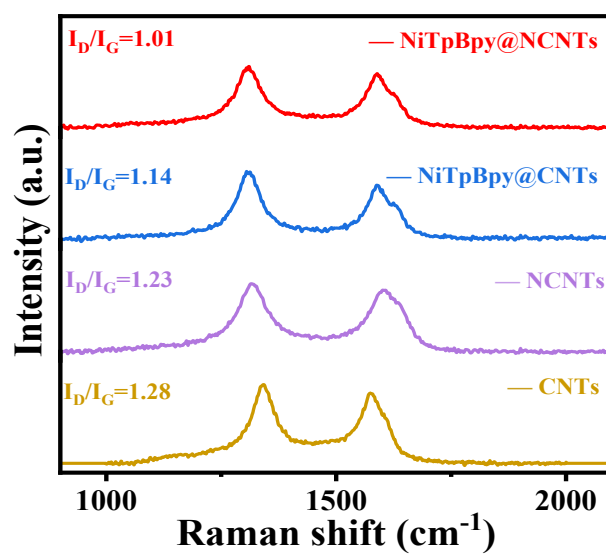

Fig. S15. Raman spectra of CNTs, NCNTs, NiTpBpy@CNTs, and NiTpBpy@NCNTs.

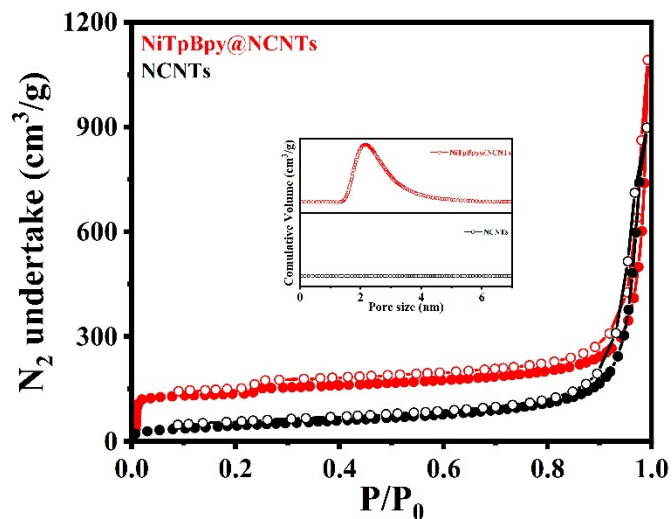

**Fig. S16.** Nitrogen adsorption-desorption isotherms of NiTpBpy@NCNTs and NCNTs. (Inset) The corresponding curves of pore size distribution.

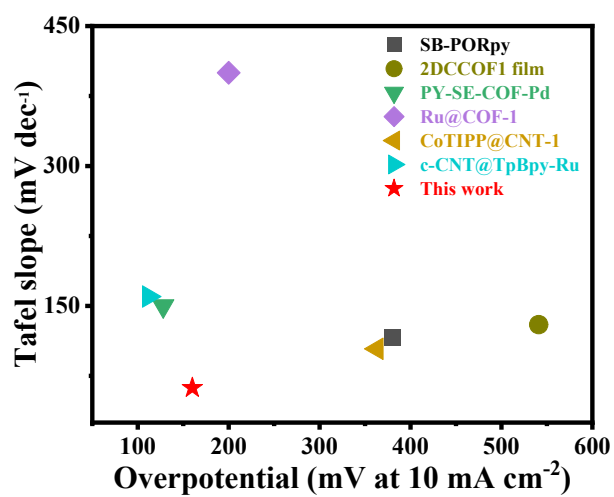

**Fig. S17.** Comparison of the HER activity of NiTpBpy@NCNTs with recently reported COFs-based HER electrocatalysts.

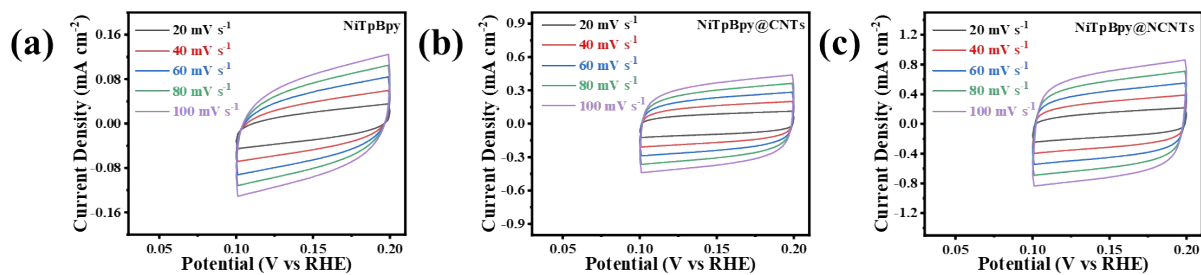

Fig. S18. CV plots for (a) NiTpBpy, (b) NiTpBpy@CNTs, and (c) NiTpBpy@NCNTs.

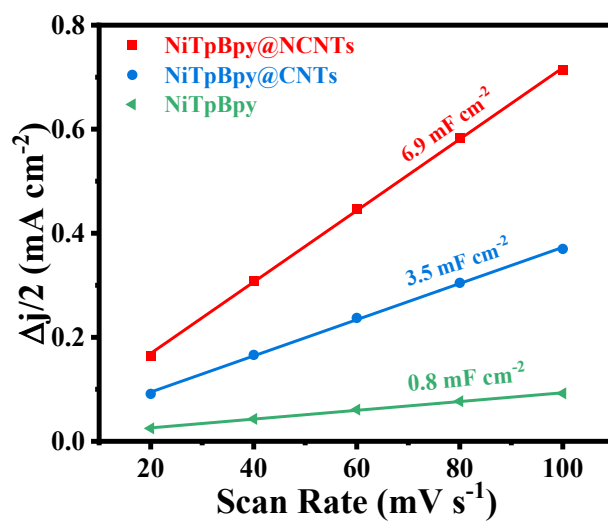

Fig. S19. Electrochemical double-layer capacitances for NiTpBpy@NCNTs, NiTpBpy@CNTs, and NiTpBpy.

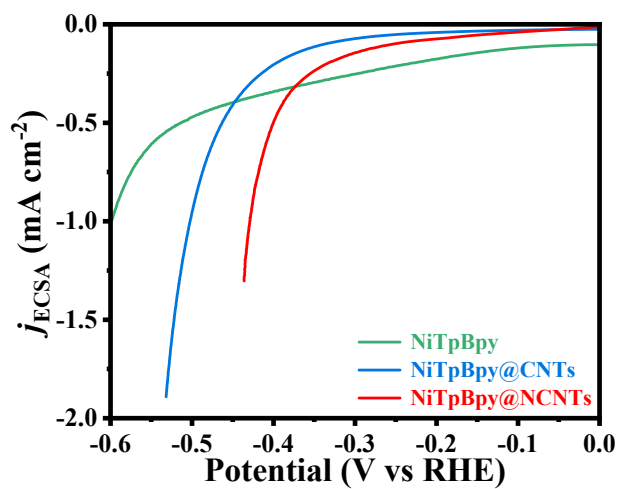

Fig. S20. ECSA-normalized LSV curves of NiTpBpy, NiTpBpy@CNTs, and NiTpBpy@NCNTs.

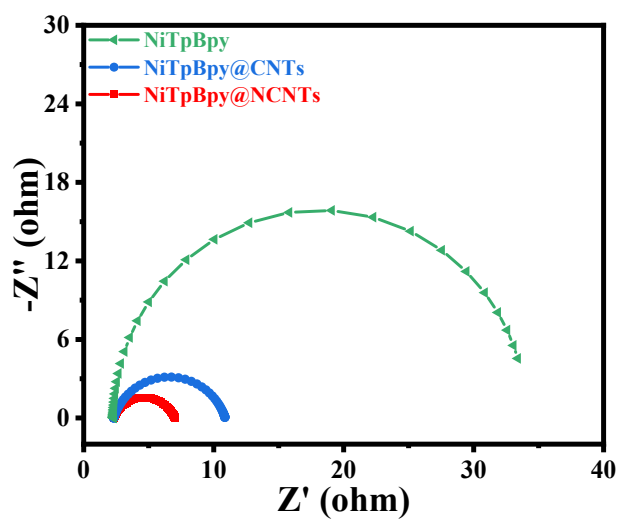

Fig. S21. Nyquist plots of NiTpBpy, NiTpBpy@CNTs, and NiTpBpy@NCNTs.

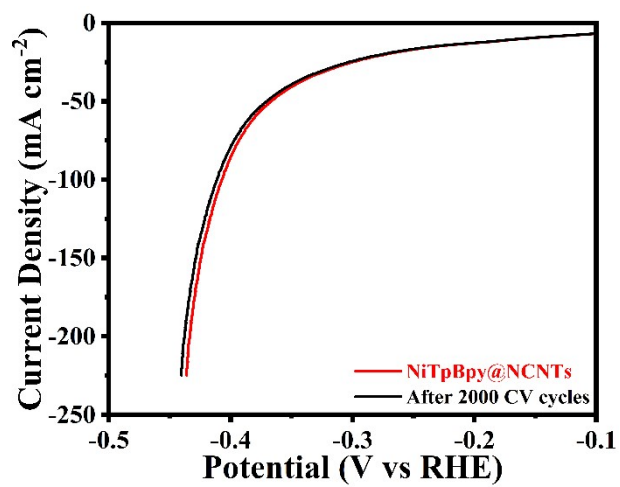

Fig. S22. The LSV curves of NiTpBpy@NCNTs before and after 2000 CV cycles.

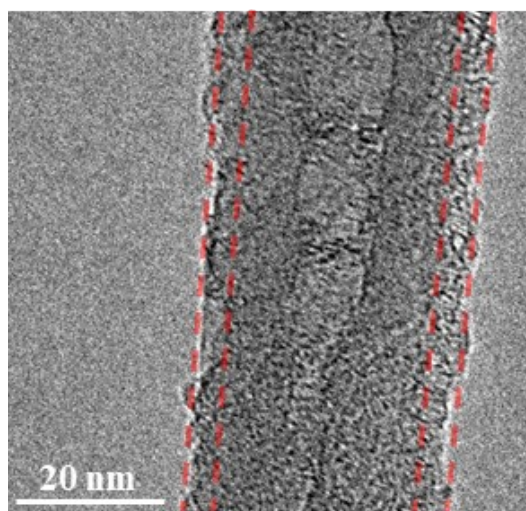

Fig. S23. TEM image of NiTpBpy@NCNTs after the HER stability test.

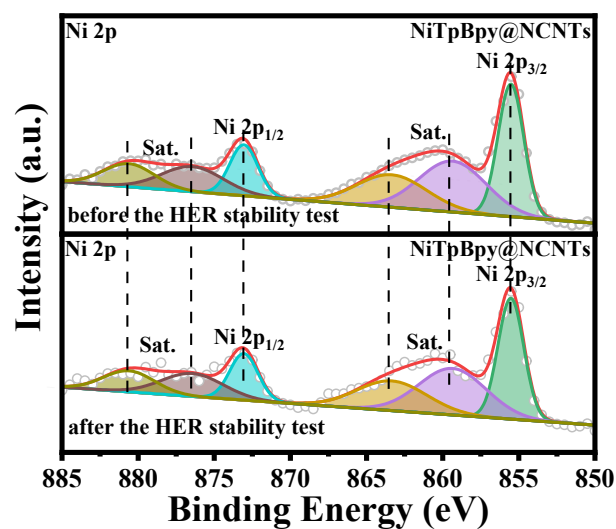

Fig. S24. Ni 2p XPS spectra of NiTpBpy@NCNTs before and after the HER stability test.

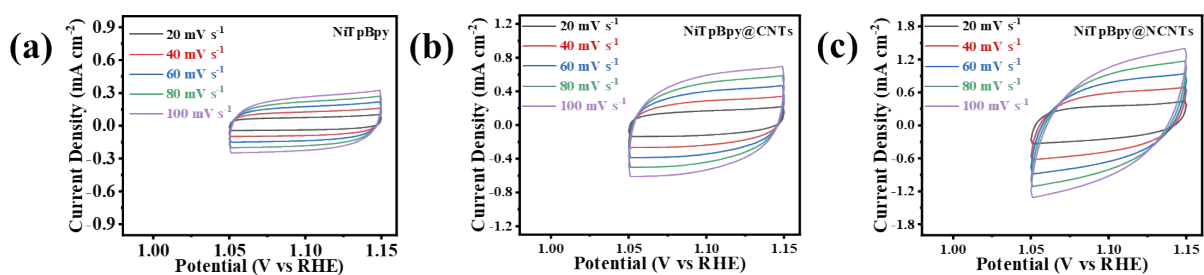

Fig. S25. CV plots for (a) NiTpBpy, (b) NiTpBpy@CNTs, and (c) NiTpBpy@NCNTs.



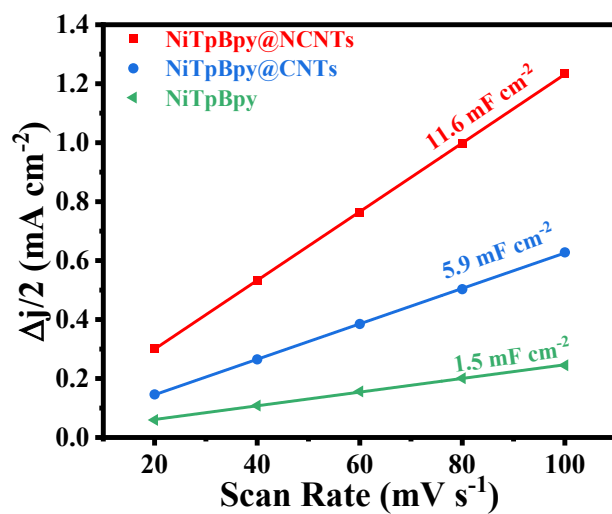

Fig. S26. Electrochemical double-layer capacitances for NiTpBpy@NCNTs, NiTpBpy@CNTs, and NiTpBpy.

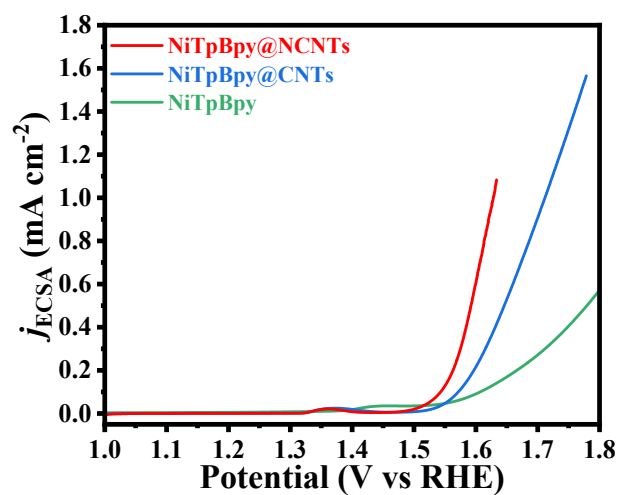

Fig. S27. The ECSA-normalized LSV curves of NiTpBpy, NiTpBpy@CNTs, and NiTpBpy@NCNTs.

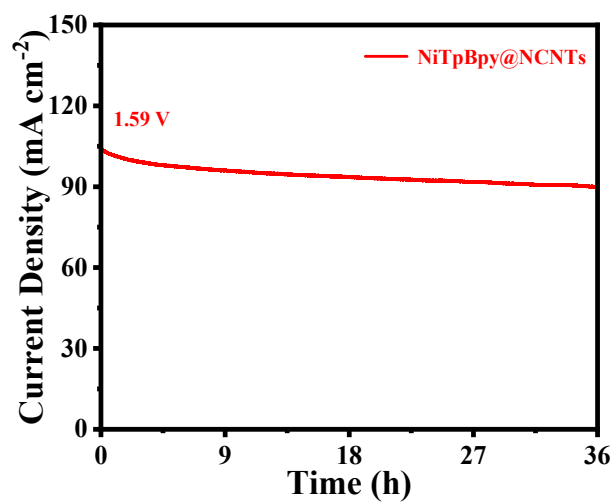

Fig. S28. Long-term stability test of NiTpBpy@NCNTs at 1.59 V vs RHE.

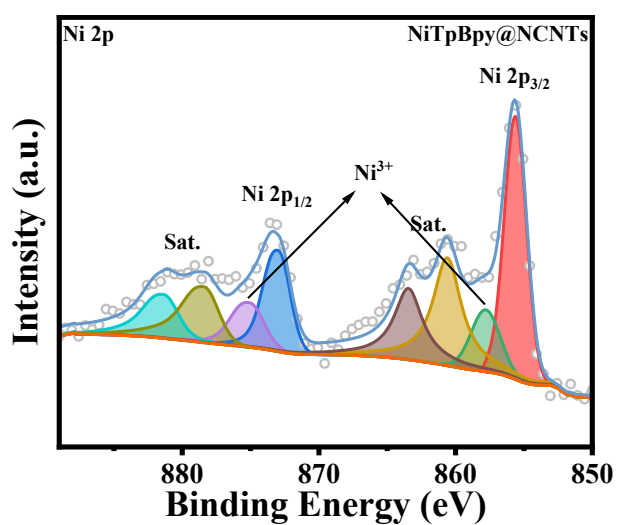

Fig. S29. Ni 2p XPS spectrum of NiTpBpy@NCNTs after the OER stability test.

Table S1. The Ni contents for the prepared samples determined by ICP-OES.

| Sample        | Ni(II) content (wt%) |
|---------------|----------------------|
| NiTpBpy       | 10.52                |
| NiTpBpy@NCNTs | 3.11                 |
| NiTpBpy@CNTs  | 3.07                 |

**Table S2.** The EXAFS fitting results include coordination number (CN), Debye-Waller factor ( $\sigma^2$ ), inner potential correction ( $\Delta E_0$ ), and bond distance (R).

| Sample  | Paths | CN    | $\sigma^2$ | $\Delta E_0$ | R (Å)   |
|---------|-------|-------|------------|--------------|---------|
| NiTpBpy | Ni–O  | 2.006 | 0.00166    | -3.185       | 1.99215 |
|         | Ni–N  | 2.006 | 0.00025    |              | 2.08988 |

**Table S3.** Summary of the previously reported COFs-based HER and OER electrocatalysts and their electrocatalytic performance.

| COFs-based electrocatalysts | Electrocatalytic reaction | Mass loading of electrocatalyst (mg cm <sup>-2</sup> ) | $\eta_{10}$ (mV) | Tafel slope (mV dec <sup>-1</sup> ) | Ref.      |
|-----------------------------|---------------------------|--------------------------------------------------------|------------------|-------------------------------------|-----------|
| SB-PORpy                    | HER                       | –                                                      | $\eta_5 = 380$   | 116                                 | 3         |
| PY-SE-COF                   | HER                       | –                                                      | –                | 263                                 | 4         |
| 2DCCOF1 film                | HER                       | –                                                      | 541              | 130                                 | 5         |
| BPT-COF-rGO                 | HER                       | –                                                      | 45               | 53                                  | 6         |
| CoTcPP                      | HER                       | 0.08                                                   | 475              | –                                   | 7         |
| PY-SE-COF-Pd                | HER                       | –                                                      | 128              | 150                                 | 4         |
| Ru@COF-1                    | HER                       | –                                                      | 200              | 140                                 | 8         |
| CoTIPP@CNT-1                | HER                       | 0.51                                                   | 363              | 104                                 | 9         |
| c-CNT@TpBpy-Ru              | HER                       | 0.5                                                    | 112              | 160                                 | 10        |
| NiTpBpy@NCNTs               | HER                       | 0.2                                                    | 160              | 62.2                                | this work |
| IISERP-COF3                 | OER                       | 0.005                                                  | 400              | –                                   | 11        |
| Tp-Tta COF                  | OER                       | 1                                                      | 430              | 129                                 | 12        |
| C4-SHz COF                  | OER                       | 0.07                                                   | 320              | 39                                  | 13        |
| JUC-630                     | OER                       | –                                                      | 400              | 104                                 | 14        |

|                                                          |     |      |                |      |           |
|----------------------------------------------------------|-----|------|----------------|------|-----------|
| Co-TpBpy                                                 | OER | –    | $\eta_1 = 400$ | 59   | 15        |
| Macro-TpBpy-Co                                           | OER | 0.25 | 380            | 54   | 16        |
| CoTAPP-PATA-COF                                          | OER | 0.2  | 420            | 56   | 17        |
| CoTAPP-BDTA-COF                                          | OER | 0.2  | 470            | 57   | 17        |
| NiTAPP-PATA-COF                                          | OER | 0.2  | 670            | –    | 17        |
| FeTAPP-PATA-COF                                          | OER | 0.2  | 550            | –    | 17        |
| ZJTU-1@Co                                                | OER | 4    | 295            | 63   | 17        |
| H <sub>2</sub> NiPcCOF                                   | OER | 3    | >430           | 68   | 18        |
| NiPcCOF                                                  | OER | 3    | 410            | 75   | 18        |
| H <sub>2</sub> FePcCOF                                   | OER | 3    | 430            | 62   | 18        |
| H <sub>2</sub> FeNiPcCOF                                 | OER | 3    | 430            | 78   | 18        |
| Ni <sub>0.5</sub> Fe <sub>0.5</sub> @COF-SO <sub>3</sub> | OER | –    | 300            | 83   | 19        |
| COF-TpDb-TZ-Co                                           | OER | –    | 390            | 82   | 20        |
| Co <sub>x</sub> Ni <sub>y</sub> -IISERP-COF2             | OER | 0.02 | 258            | 39   | 21        |
| Ni <sub>3</sub> N-IISERP-COF3                            | OER | 0.07 | 230            | 79   | 22        |
| Fe-SAC@COF                                               | OER | 1    | 290            | 40   | 12        |
| Ni-SAC@COF                                               | OER | 1    | 337            | 45   | 12        |
| Fe-NP/COF                                                | OER | 1    | 359            | 51   | 12        |
| NiTIPP@CNT-2                                             | OER | 0.51 | 320            | 57   | 8         |
| COF-366-Co@CNT                                           | OER | –    | 358            | 62   | 23        |
| NiTpBpy@NCNTs                                            | OER | 0.2  | 280            | 59.1 | this work |

**Table S4.** Summary of the previously reported COFs-based electrocatalysts for overall water splitting in an alkaline two-electrode system.

| catalyst       | electrolyte | cell voltage (V) at 10 mA cm <sup>-2</sup> | Ref.      |
|----------------|-------------|--------------------------------------------|-----------|
| CoTIPP@CNT-1   | 1.0 M KOH   | 2.04                                       | 9         |
| CoTAPP-COF-Fe  | 1.0 M KOH   | 1.80                                       | 24        |
| FeTPP@NiTPP/NF | 1.0 M KOH   | 1.62                                       | 25        |
| NiTpBpy@NCNTs  | 1.0 M KOH   | 1.59                                       | this work |

## References

- 1 Q. Sun, B. Aguila, J. Perman, N. Nguyen and S. Ma, *J. Am. Chem. Soc.*, 2016, **138**, 15790-15796.
- 2 E. P. Jahrman, W. M. Holden, A.S. Ditter, D. R. Mortensen, G. T. Seidler, T. T. Fister, S. A. Kozimor, L. F. J. Piper, J. Rana, N. C. Hyatt and M. C. Stennett, *Sci. Instrum.*, 2019, **90**,024106.
- 3 S. Bhunia, S. K. Das, R. Jana, S. C. Peter, S. Bhattacharya, M. Addicoat, A. Bhaumik and A. Pradhan, *ACS Appl. Mater. Interfaces*, 2017, **9**, 23843.
- 4 J.Yue, X. Ding, L. Song, Y. Wang, P. Yang, Y. Ma and B. Tang, *Micropor. Mesopor. Mater.*, 2022, **344**, 112169.
- 5 D. Zhou, X. Tan, H. Wu, L. Tian and M. Li, *Angew. Chem. Int. Ed.*, 2019, **58**, 1376.
- 6 Y. Bai, Y. Liu, M. Liu, X. Wang, S. Shang, W. Gao, C. Du, Y. Qiao, J. Chen, J. Dong and Y. Liu, *Angew. Chem. Int. Ed.*, 2022, **61**, e202113067.
- 7 Y. Wu, J. M. Veleta, D. Tang, A. D. Price, C. E. Botez and D. Villagrán, *Dalt. Trans.*, 2018, **47**, 8801.

- 8 Y. Zhao, Y. Liang, D. Wu, H. Tian, T. Xia, W. Wang, W. Xie, X. Hu, W. Tian and Q. Chen, *Small*, 2022, **18**, 2107750.
- 9 Y. Wang, D. Song, J. Li, Q. Shi, J. Zhao, Y. Hu, F. Zeng and N. Wang, *Inorg. Chem.*, 2022, **61**, 10198-10204.
- 10 X. Sun, Y. Hu, Y. Fu, J. Yang, D. Song, B. Li, W. Xu and N. Wang, *Small*, 2024, **20**, 2305978.
- 11 S. Nandi, S. K. Singh, D. Mullangi, R. Illathvalappil, L. George, C. P. Vinod, S. Kurungot and R. Vaidhyanathan, *Adv. Energy Mater.*, 2016, **6**, 1601189.
- 12 Wang, X.; Sun, L.; Zhou, W.; Yang, L.; Ren, G.; Wu, H.; Deng, W. Q. Iron single-atom catalysts confined in covalent organic frameworks for efficient oxygen evolution reaction. *Cell Reports Phys. Sci.*, **2022**, *3*, 100804.
- 13 S. Mondal, B. Mohanty, M. Nurhuda, S. Dalapati, R. Jana, M. Addicoat, A. Datta, B. K. Jena and A. Bhaumik, *ACS Catal.*, 2020, **10**, 5623.
- 14 W. Xia, C. Ji, R. Wang, S. Qiu and Q. Fang, Q. *Acta Phys. Chim. Sin.*, 2023, **39**, 1-7.
- 15 H. B. Aiyappa, J. Thote, D. B. Shinde, R. Banerjee and S. Kurungot, *Chem. Mater.*, 2016, **28**, 4375.
- 16 X. Zhao, P. Pachfule, S. Li, T. Langenhahn, M. Ye, C. Schlesiger, S. Praetz, J. Schmidt and A. Thomas, *J. Am. Chem. Soc.*, 2019, **141**, 6623.
- 17 M. Liu, S. Liu, C. Cui, Q. Miao, Y. He, X. Li, Q. Xu and G. Zeng, *Angew. Chem. Int. Ed.*, 2022, **61**, e202213522.
- 18 J. J. Jarju, A. M. Díez, L. Frey, V. Sousa, E. Carbó-Argibay, L. P. L. Gonçalves, D. D. Medina, O. I. Lebedev, Y. V. Kolen'ko and L. M. Salonen, *Mater. Today Chem.*, 2022, *26*, 101032.
- 19 Z. Gao, L. L. Gong, X. Q. He, X. Su, L. Xiao, F. Luo, *Inorg. Chem.*, 2020, **59**, 4995-5003.
- 20 Y. Liang, T. Xia, Z. Wu, Y. Yang, Y. Li, Z. Sui, C. Li, R. Fan, X. Tian and Q. Chen, *Today Chem.*, 2022, **24**, 100777.
- 21 D. Mullangi, V. Dhavale, S. Shalini, S. Nandi, S. Collins, T. Woo, S. Kurungot and R. Vaidhyanathan, *Adv. Energy Mater.*, 2016, **6**, 1600110.
- 22 S. Nandi, S. K. Singh, D. Mullangi, R. Illathvalappil, L. George, C. P. Vinod, S. Kurungot and R. Vaidhyanathan, *Adv. Energy Mater.*, 2016, **6**, 1601189.
- 23 Z. Gan, S. Lu, L. Qiu, H. Zhu, H. Gu and M. Du, *Chem. Eng. J.*, 2021, **415**, 127850.
- 24 G. Cai, L. Zeng, L. He, S. Sun, Y. Tong and J. Zhang, *Chem. Asian J.*, 2020, **15**, 1963-1969.
- 25 S. Yuan, L. Cui, X. He, W. Zhang and T. Asefa, *Int. J. Hydrogen Energ.*, 2020, **45**, 28860-28869.
